# Supplementary material
Source: publisher figshare collection journal article supplement (https://future-science-group.figshare.com/ndownloader/files/28456032)
Supplement: Supplementary file 1 [file 28456032]

## Sheet: Table S2
sub-network	cluster	module
sub-network 1	3	1	Digoxin	Clobetasol propionate	Ingenol Mebutate	Ouabain	Prednicarbate	Steviolbioside	Fluocinolone Acetonide	Flunisolide	Flurandrenolide	Ginseng	Budesonide	Deslanoside	Desonide	Acetyldigitoxin	Loteprednol	Digitoxin	Ivermectin	Triamcinolone
sub-network 2	8	1	Dronabinol	Dezocine	Diflunisal	Gallamine Triethiodide	Etacrynic acid	Vanillyl butyl ether	Danthron	Quinestrol	Mestranol
sub-network 3	3	2	Clobetasone	Methylprednisolone	Fluprednisolone	Fludrocortisone	Paramethasone	Prednisolone	Dexamethasone	Fluorometholone	Fusidic Acid	Drospirenone	Betamethasone
sub-network 4	8	2	D-alpha-Tocopherol acetate	alpha-Tocopherol acetate	Vitamin E
sub-network 5	1	3	Quinethazone	Opicapone
sub-network 6	2	3	Apomorphine	Tacrolimus	Iothalamic acid	Quinagolide	Besifloxacin	Orciprenaline	Terbutaline
sub-network 7	4	3	Pimecrolimus	Cefotiam	Acarbose	Clofarabine	Inosine	Ceftibuten
sub-network 8	8	3	Griseofulvin	Josamycin	Spiramycin	Fenoldopam
sub-network 9	2	4	Clenbuterol	Entacapone	Verapamil	Oxymetazoline
sub-network 10	4	4	Cefepime	Telaprevir	Meropenem	Nystatin	Enoxaparin	Dirithromycin	Doripenem	Spinosad	Cefdinir	Ceftriaxone	Cefixime	Cefpodoxime	Papain	Ardeparin	Cefotaxime	Prezatide	Aztreonam	Ceftizoxime	Entecavir	Tazobactam	Heparin
sub-network 11	6	4	Polythiazide	Mepiprazole	Benzthiazide	Lofexidine	Cyclothiazide
sub-network 12	8	4	Mycophenolic acid	Natamycin	Tolcapone	Nabilone
sub-network 13	1	5	Valdecoxib	Suramin	Chloroxine	Bicalutamide	Clioquinol	Cinolazepam	Propericiazine	Cariprazine	Indapamide	Lodoxamide	Trametinib	Enzalutamide	Metolazone	Nitrofurantoin	Furazolidone	Rimonabant	Etoricoxib	Topiroxostat	Isoxaflutole	Diiodohydroxyquinoline	Butoconazole	Ripasudil	Isocarboxazid	Indigotindisulfonic Acid	Fluphenazine
sub-network 14	2	5	Propiomazine	Tianeptine	Liotrix	Iohexol	Iopamidol	Estramustine	Nilvadipine	Midodrine	Aceprometazine	Carbidopa	Propoxyphene napsylate	Metocurine Iodide	Lucanthone	Levocabastine	Iodipamide	Niclosamide	Dextrothyroxine	Acepromazine	Liothyronine	Cobimetinib	Lumiracoxib	Meclofenamic acid	Chloramphenicol	Eltrombopag	Diclofenac	Escitalopram	Metrizoic acid	Tamsulosin	Ioversol	Aceclofenac	Methoxamine	Ioxilan	Levothyroxine	Olaparib	Deferasirox	Benserazide	Chlorthalidone	Vilanterol	Metipranolol	Tegaserod	Ranitidine	Balsalazide	Halofantrine	Iomeprol	Iobitridol	Diatrizoate	Citalopram
sub-network 15	6	5	Cyamemazine	Strontium ranelate	Trifluoperazine	Luliconazole	Sulconazole	Triflupromazine
sub-network 16	8	5	alpha-Tocopherol succinate	Zotepine	Methoxsalen	Tocofersolan	Amiodarone	Moxisylyte	Fluticasone furoate	Peppermint oil	Esculin	Paroxetine	Zaltoprofen
sub-network 17	3	6	Desoximetasone	Fluocortolone	Rimexolone	Difluocortolone
sub-network 18	1	7	Gefitinib	Clonixin	Montelukast	Suvorexant	Hydroxychloroquine	Telotristat ethyl	Amodiaquine	Neratinib	Ziprasidone
sub-network 19	2	7	Aripiprazole	Fominoben
sub-network 20	1	8	Dantrolene	Nitazoxanide	Benznidazole	Pretomanid
sub-network 21	2	8	Nicardipine	Cinitapride	Benidipine	Barnidipine	Azelnidipine	Manidipine	Lercanidipine
sub-network 22	7	8	Pentaerythritol Tetranitrate	Erythrityl Tetranitrate	Nitroglycerin	Metronidazole	Isosorbide Mononitrate	Isosorbide Dinitrate
sub-network 23	1	9	Light green SF yellowish	Celecoxib
sub-network 24	2	9	Pentazocine	Levorphanol
sub-network 25	3	9	Alclometasone	Spironolactone	Fluocinonide	Clocortolone	Halcinonide	Amcinonide	Ciclesonide	Fluclorolone acetonide
sub-network 26	8	9	Estriol	Piperonyl butoxide	Levallorphan	Arbutin	Rose bengal	Oxybenzone	Mesalazine
sub-network 27	1	10	Efavirenz	Patent Blue V	Indocyanine green	Trypan blue
sub-network 28	2	10	Dextromethorphan	Olsalazine
sub-network 29	3	10	Fluticasone propionate	Hydrocortamate
sub-network 30	4	10	Mitomycin	Streptomycin	Polaprezinc	Tauroursodeoxycholic acid	Eribulin	Cefotetan
sub-network 31	8	10	Diacerein	Phloxine B	Trioxsalen	Amphotericin B
[truncated: 2 more columns]
